# Supplementary material for: An Organic Fertilizer ‘Doped’ with a Bacillus Strain Improves Melon and Pepper Yield, Modifying the Rhizosphere Microbiome with Negligible Changes in the Bulk Soil Microbiome
Source: MDPI journal article supplement (doi:10.3390/agronomy12112620), 2022-10-25
Supplement: s1 [file s1]

## Supplementary Information

### An organic fertilizer 'doped' with a *Bacillus* strain improves melon and pepper yield, modifying the rhizosphere microbiome with negligible changes in the bulk soil microbiome

Noemí Ortiz-Liébana<sup>1</sup>, Maurizio Zotti<sup>2</sup>, Marcia Barquero<sup>1</sup>, Fernando González-Andrés<sup>1</sup>

<sup>1</sup> Institute of Environmental, Natural Resources and Biodiversity, University of León, León 24009, Spain.

<sup>2</sup> Department of Agricultural Sciences, University of Naples Federico II, Portici 80055, Italy.

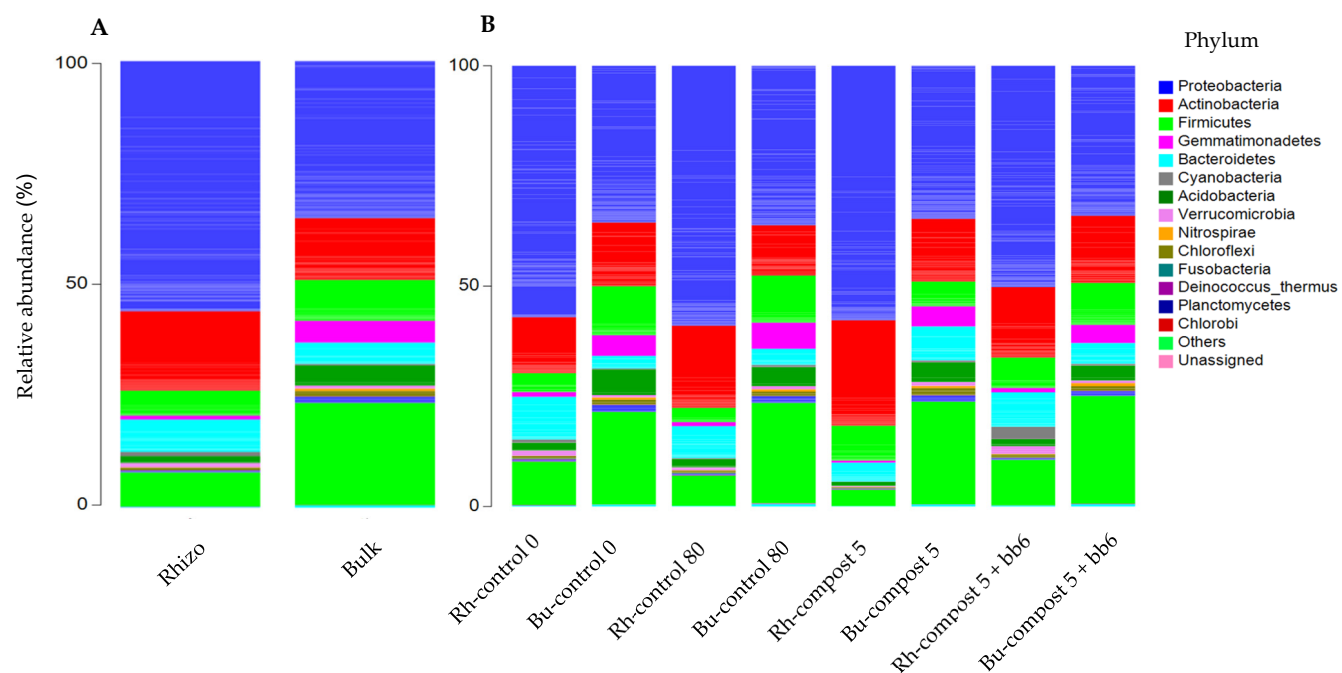

**Figure S1.** Stacked bar plot indicating the relative abundance of bacterial phyla for the factors: A) type of soil B) type of soil and treatment.

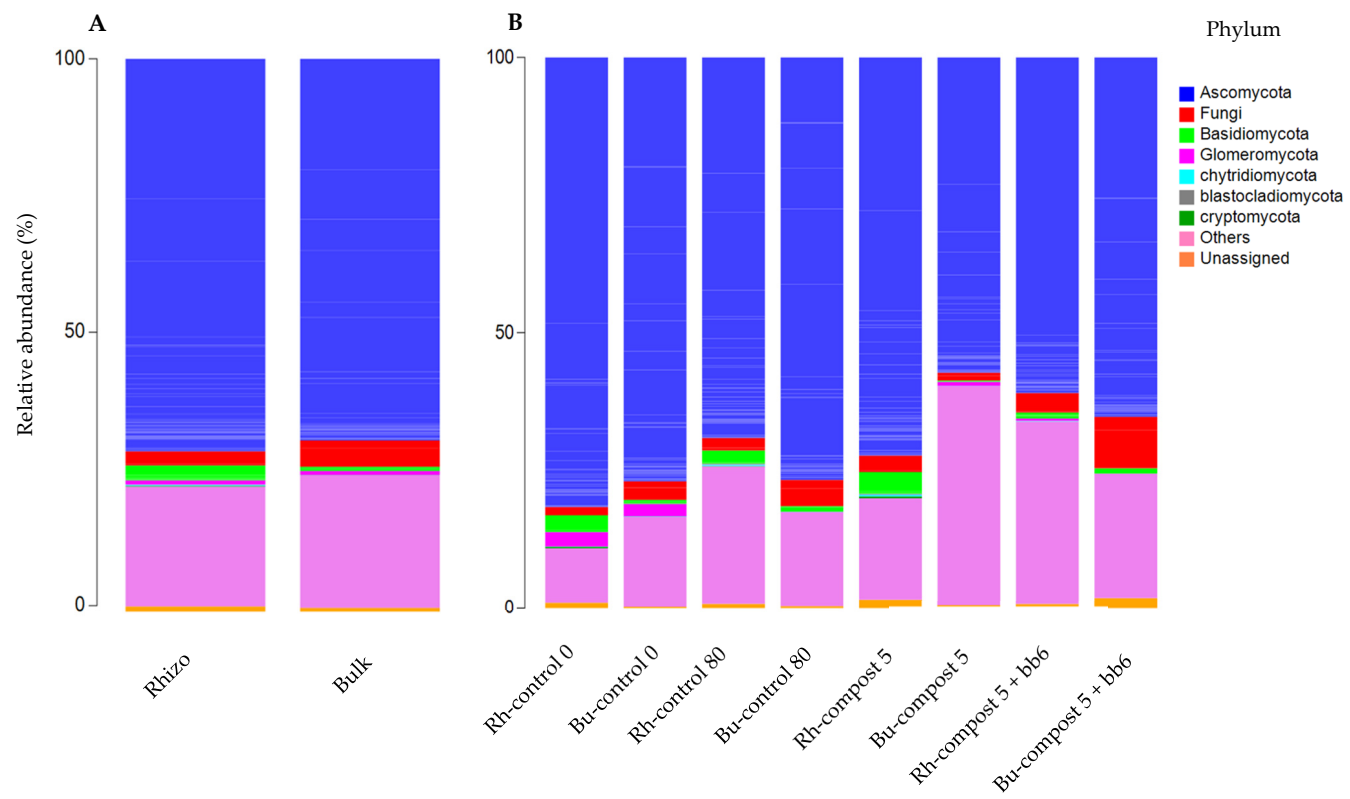

**Figure S2.** Stacked bar plot indicating the relative abundance of fungal phyla for the factors: A) type of soil  
B) type of soil and treatment.

**Table S1.** Composition of the compost used.

| Parameter                      | Value     |
|--------------------------------|-----------|
| N Kjeldahl (%)                 | 2.08      |
| P (mg/kg)                      | 4683.30   |
| K (mg/kg)                      | 20,600.70 |
| Ca (mg/kg)                     | 76,196.00 |
| Mg (mg/kg)                     | 6097.30   |
| Na (mg/kg)                     | 2387.00   |
| Fe (mg/kg)                     | 1868.30   |
| Mn (mg/kg)                     | 101.20    |
| Zn (mg/kg)                     | 111.10    |
| Cu (mg/kg)                     | 7.49      |
| Cr (mg/kg)                     | 8.40      |
| Ni (mg/kg)                     | 4.90      |
| Hg (mg/kg)                     | 0.09      |
| Cd (mg/kg)                     | 0.19      |
| Pb (mg/kg)                     | 2.62      |
| pH (soil:water)                | 8.55      |
| Oxidizable organic carbon (%)  | 15.08     |
| Organic Matter (%)             | 25.93     |
| C/N Ratio                      | 7.24      |
| Electrical Conductivity (ds/m) | 6.75      |
| Particle size (mm)             | 1.55      |

**Table S2.** Composition of the biochar used for the experiment.

| Parameter                           | Value |
|-------------------------------------|-------|
| Humidity <sup>a</sup>               | 8.00  |
| Volatiles <sup>a</sup>              | 7.30  |
| Ash <sup>b</sup>                    | 8.99  |
| Carbon <sup>b</sup>                 | 92.07 |
| Hydrogen <sup>b</sup>               | 0.89  |
| Nitrogen <sup>b</sup>               | 2.29  |
| Sulphur <sup>b</sup>                | 0.01  |
| Oxygen <sup>b</sup>                 | 4.74  |
| Higher calorific value <sup>b</sup> | 29.04 |
| Lower calorific value <sup>b</sup>  | 28.94 |

<sup>a</sup> results expressed on a dry basis

<sup>b</sup> results expressed on a dry and ash-free basis

**Table S3.** Soil analysis previous to the field trials. \* Total N: organic + nitric + ammonia nitrogen.

| Parameter                                            |      | Melon crop |       | Pepper crop |       |
|------------------------------------------------------|------|------------|-------|-------------|-------|
|                                                      |      | 2018       | 2019  | 2018        | 2019  |
|                                                      | Sand | 41.60      | 43.80 | 9.20        | 51.90 |
| Texture (%)                                          | Silt | 28.10      | 28.90 | 25.40       | 31.10 |
|                                                      | Clay | 30.30      | 27.30 | 65.40       | 17.00 |
| pH 1:2 (soil:water)                                  |      | 8.78       | 8.86  | 7.93        | 8.90  |
| Electric conductivity (dS/m)                         |      | 0.66       | 0.29  | 3.27        | 0.42  |
| Organic matter (%)                                   |      | 1.04       | 1.24  | 0.98        | 1.34  |
| Total nitrogen* (%)                                  |      | 0.069      | 0.068 | 0.071       | 0.076 |
| Ratio C/N                                            |      | 8.72       | 10.62 | 8.02        | 10.26 |
| P <sub>2</sub> O <sub>5</sub> (mg kg <sup>-1</sup> ) |      | 69.70      | 20.60 | 12.50       | 58.60 |
| K (meq 100g <sup>-1</sup> )                          |      | 1.86       | 0.51  | 1.32        | 1.86  |
| Ca (meq 100g <sup>-1</sup> )                         |      | 6.90       | 11.12 | 21.52       | 6.74  |
| Mg (meq 100g <sup>-1</sup> )                         |      | 2.72       | 3.41  | 4.27        | 2.45  |
| Na (meq 100g <sup>-1</sup> )                         |      | 1.49       | 0.90  | 4.04        | 0.98  |

**Table S4.** Climatic conditions of the locations selected for field trials in 2018 and 2019. Hmax: maximum high temperature (°C); Havg: average high temperature (°C); Lmin: minimum low temperature (°C); Lavg: average low temperature (°C).

| Crop   | Location      | Date | Temperatures (°C) |           |           |           | Monthly rainfall (mm) |      |
|--------|---------------|------|-------------------|-----------|-----------|-----------|-----------------------|------|
|        |               |      | Hmax (°C)         | Havg (°C) | Lmin (°C) | Lavg (°C) |                       |      |
| Melon  | Rambla Salada | 2018 | April             | 25.8      | 22.6      | 8.3       | 12.8                  | 7.4  |
|        |               |      | May               | 29.2      | 25.1      | 9.6       | 15.0                  | 2.2  |
|        |               |      | June              | 33.6      | 29.2      | 14.7      | 19.1                  | 10.2 |
|        |               |      | July              | 33.6      | 31.4      | 19.7      | 21.6                  | 0.0  |
|        | Los Lorentes  | 2019 | May               | 30.0      | 25.3      | 11.2      | 15.2                  | 0.8  |
|        |               |      | June              | 36.9      | 29.0      | 15.5      | 18.7                  | 3.0  |
|        |               |      | July              | 37.1      | 32.9      | 20.4      | 23.2                  | 0.0  |
|        |               |      | August            | 35.2      | 32.7      | 19.5      | 22.7                  | 4.4  |
| Pepper | El Moaire     | 2018 | June              | 33.6      | 29.2      | 14.7      | 19.1                  | 10.2 |
|        |               |      | July              | 33.6      | 31.4      | 19.7      | 21.6                  | 0.0  |
|        |               |      | August            | 36.8      | 33.6      | 22.2      | 23.7                  | 0.0  |
|        |               |      | September         | 33.8      | 30.1      | 17.7      | 21.6                  | 57.6 |
|        | Rambla Salada | 2019 | June              | 36.9      | 29.0      | 15.5      | 18.7                  | 3.0  |
|        |               |      | July              | 37.1      | 32.9      | 20.4      | 23.2                  | 0.0  |
|        |               |      | August            | 35.2      | 32.7      | 19.5      | 22.7                  | 4.4  |
|        |               |      | September         | 32.9      | 29.4      | 16.3      | 20.5                  | 50.4 |

**Table S5.** Mean values for yield, yield components and biomass production, obtained in the field trial for the melon crop. Means followed by the same letter did not differ significantly at  $p \leq 0.05$  in Tukey's test.

| Compost dose<br>(t/ha) | Additive dose<br>(%) | Fresh aerial<br>vegetative biomass<br>(g per plant) | Dry aerial<br>vegetative biomass<br>(g per plant) | Yield<br>(kg ha <sup>-1</sup> ) | Number fruits<br>per plant | Fruit weight<br>(g) | Number fruits<br>per ha |
|------------------------|----------------------|-----------------------------------------------------|---------------------------------------------------|---------------------------------|----------------------------|---------------------|-------------------------|
| 2                      | 0                    | 1759 a                                              | 1315 a                                            | 37079 a                         | 3.08 a                     | 2193 a              | 16898 a                 |
|                        | 3                    | 1888 ab                                             | 1395 ab                                           | 38118 a                         | 2.92 a                     | 2387 b              | 15973 a                 |
|                        | 6                    | 2083 b                                              | 1553 b                                            | 48235 b                         | 3.73 b                     | 2371 b              | 20327 b                 |
|                        | average              | 1910                                                | 1421                                              | 41144                           | 3.24                       | 2317                | 17732                   |
| 5                      | 0                    | 1638 a                                              | 1210 a                                            | 37488 a                         | 3.11 a                     | 2200 a              | 17034 a                 |
|                        | 3                    | 2264 b                                              | 1679 b                                            | 42933 b                         | 3.37 a                     | 2346 b              | 18319 ab                |
|                        | 6                    | 2450 b                                              | 1806 b                                            | 45245 b                         | 3.44 a                     | 2400 b              | 18842 b                 |
|                        | average              | 2117                                                | 1565                                              | 41889                           | 3.31                       | 2315                | 18065                   |

**Table S6.** Mean values for yield, yield components and biomass production, obtained in the field trial for the pepper crop. Means followed by the same letter did not differ significantly at  $p \leq 0.05$  in Tukey's test.

| Compost dose<br>(t/ha) | Additive dose<br>(%) | Fresh aerial<br>vegetative biomass<br>(g per plant) | Dry aerial<br>vegetative biomass<br>(g per plant) | Yield<br>(kg ha <sup>-1</sup> ) | Number fruits<br>per plant | Fruit weight<br>(g) | Number fruits<br>per ha |
|------------------------|----------------------|-----------------------------------------------------|---------------------------------------------------|---------------------------------|----------------------------|---------------------|-------------------------|
| 2                      | 0                    | 281 a                                               | -                                                 | 43131 a                         | 21.1 a                     | 82.3 a              | 526806 a                |
|                        | 3                    | 332 b                                               | -                                                 | 47586 ab                        | 25.2 b                     | 76.1 a              | 629869 b                |
|                        | 6                    | 362 b                                               | -                                                 | 50593 b                         | 24.7 b                     | 82.5 a              | 617224 b                |
|                        | average              | 325                                                 | -                                                 | 47103                           | 23.7                       | 80.3                | 591300                  |
| 5                      | 0                    | 294 a                                               | -                                                 | 44786 a                         | 24.9 a                     | 72.0 a              | 623534 a                |
|                        | 3                    | 321 b                                               | -                                                 | 47932 ab                        | 22.1 a                     | 87.3 b              | 553266 a                |
|                        | 6                    | 330 b                                               | -                                                 | 51298 b                         | 23.5 a                     | 88.4 b              | 587018 a                |
|                        | average              | 315                                                 | -                                                 | 48005                           | 23.5                       | 82.6                | 587939                  |

**Table S7.** Mean values for leaf chlorophyll content, flowering and several fruit parameters obtained in the field trial for the melon crop. Means followed by the same letter did not differ significantly at  $p \leq 0.05$  in Tukey's test.

| Compost dose<br>(t/ha) | Additive dose<br>(%) | Chlorophyll<br>(CCI) | Flowering<br>(%) | Penetrometry<br>(kg) | Fruit contour<br>(cm) | Conductivity<br>( $\mu\text{S cm}^{-1}$ ) | Solute concentration<br>( $\text{mg l}^{-1}$ ) |
|------------------------|----------------------|----------------------|------------------|----------------------|-----------------------|-------------------------------------------|------------------------------------------------|
| 2                      | 0                    | 25.8 a               | 10 a             | 2.2 a                | 41.8 a                | 4.87 a                                    | 1567 a                                         |
|                        | 3                    | 26.2 a               | 12 a             | 2.1 a                | 43.7 b                | 5.04 ab                                   | 1652 b                                         |
|                        | 6                    | 30.3 b               | 19 b             | 2.2 a                | 43.2 b                | 5.23 b                                    | 1778 c                                         |
|                        | average              | 27.4                 | 14               | 2.2                  | 42.9                  | 5.05                                      | 1666                                           |
| 5                      | 0                    | 34.1 a               | 38 a             | 2.5 a                | 49.3 a                | 5.1 a                                     | 1630 a                                         |
|                        | 3                    | 37.1 b               | 38 a             | 2.1 b                | 47.9 a                | 5.3 a                                     | 1685 a                                         |
|                        | 6                    | 38.5 b               | 41 a             | 2.0 b                | 49.1 a                | 5.5 b                                     | 1909 b                                         |
|                        | average              | 36.6                 | 39               | 2.2                  | 48.9                  | 5.3                                       | 1742                                           |



**Table S8.** Mean values for leaf chlorophyll content, flowering and several fruit parameters obtained in the field trial for the pepper crop. Means followed by the same letter did not differ significantly at  $p \leq 0.05$  in Tukey's test.

| Compost dose<br>(t/ha) | Additive dose<br>(%) | Chlorophyll<br>(CCI) | Fruit contour<br>(mm) | Conductivity<br>( $\mu\text{S cm}^{-1}$ ) | Solute concentration<br>( $\text{mg l}^{-1}$ ) |
|------------------------|----------------------|----------------------|-----------------------|-------------------------------------------|------------------------------------------------|
| 2                      | 0                    | 79.6 a               | 46.1 a                | 4.5 a                                     | 2753 b                                         |
|                        | 3                    | 74.8 a               | 46.2 a                | 4.4 a                                     | 2330 a                                         |
|                        | 6                    | 79.9 a               | 44.8 a                | 3.9 a                                     | 2408 a                                         |
|                        | average              | 78.1                 | 45.7                  | 4.24                                      | 2497                                           |
| 5                      | 0                    | 83.5 a               | 46.2 a                | 4.2 a                                     | 2610 b                                         |
|                        | 3                    | 86.3 a               | 45.9 a                | 3.9 a                                     | 2408 a                                         |
|                        | 6                    | 85.9 a               | 47.1 a                | 3.8 a                                     | 2382 a                                         |
|                        | average              | 85.2                 | 46.4                  | 3.9                                       | 2467                                           |
